# Supplementary material for: Interactome analysis reveals ZNF804A, a schizophrenia risk gene, as a novel component of protein translational machinery critical for embryonic neurodevelopment
Source: PubMed Central journal article supplement — Mol Psychiatry. 2017 Sep 19;23(4):952–62. doi: 10.1038/mp.2017.166 (PMC5868632; doi:10.1038/mp.2017.166), 2017-09-19
Supplement: mp2017166x17.pdf [file mp2017166x17.pdf]

**Table S2 GO analysis Y2H genes**

|                                      |                                                    |               |                     |                       |                            |                    |
|--------------------------------------|----------------------------------------------------|---------------|---------------------|-----------------------|----------------------------|--------------------|
| Analysis Type:                       | PANTHER Overrepresentation Test (release 20170413) |               |                     |                       |                            |                    |
| Annotation Version and Release Date: | PANTHER version 11.1<br>Released 2016-10-24        |               |                     |                       |                            |                    |
| Analyzed List:                       | upload_1 (Homo sapiens)                            |               |                     |                       |                            |                    |
| Reference List:                      | Homo sapiens (all genes in database)               |               |                     |                       |                            |                    |
| Bonferroni correction:               | TRUE                                               |               |                     |                       |                            |                    |
| Bonferroni count:                    | 241                                                |               |                     |                       |                            |                    |
| PANTHER GO-Slim Biological Process   | Homo sapiens - REFLIST (20972)                     | upload_1 (23) | upload_1 (expected) | upload_1 (over/under) | upload_1 (fold Enrichment) | upload_1 (P-value) |
| translation (GO:0006412)             | 323                                                | 5             | 0.35                | +                     | 14.11                      | 5.57E-03           |
| Unclassified (UNCLASSIFIED)          | 8633                                               | 3             | 9.47                | -                     | 0.32                       | 0.00E+00           |
