# Supplementary material for: Interactome analysis reveals ZNF804A, a schizophrenia risk gene, as a novel component of protein translational machinery critical for embryonic neurodevelopment
Source: PubMed Central journal article supplement — Mol Psychiatry. 2017 Sep 19;23(4):952–62. doi: 10.1038/mp.2017.166 (PMC5868632; doi:10.1038/mp.2017.166), 2017-09-19
Supplement: mp2017166x18.pdf [file mp2017166x18.pdf]

| ensembl_id            | type           | str | symbol        | length | chr   |
|-----------------------|----------------|-----|---------------|--------|-------|
| ENSMUSG00000087497.5  | antisense      | +   | 2810001G20Rik | 959    | chr11 |
| ENSMUSG00000089665.1  | antisense      | -   | Fcor          | 366    | chr8  |
| ENSMUSG00000063714.13 | antisense      | +   | Sp3os         | 870    | chr2  |
| ENSMUSG00000092564.1  | antisense      | -   | BC051226      | 837    | chr17 |
| ENSMUSG00000086429.7  | antisense      | -   | Gt(ROSA)26Sor | 1572   | chr6  |
| ENSMUSG00000060424.12 | lincRNA        | -   | Pantr1        | 4060   | chr1  |
| ENSMUSG00000087211.5  | lincRNA        | +   | Lhx1os        | 589    | chr11 |
| ENSMUSG00000097248.6  | lincRNA        | +   | Gm2694        | 5003   | chr8  |
| ENSMUSG00000098087.1  | lincRNA        | -   | Gm17750       | 529    | chr13 |
| ENSMUSG00000073155.10 | lincRNA        | +   | 1810058I24Rik | 2611   | chr6  |
| ENSMUSG00000100691.1  | lincRNA        | +   | 2010320M18Rik | 1009   | chr8  |
| ENSMUSG00000099061.1  | lincRNA        | -   | Gm28050       | 984    | chr5  |
| ENSMUSG00000098234.5  | lincRNA        | -   | Snhg6         | 979    | chr1  |
| ENSMUSG00000097383.1  | lincRNA        | +   | 1500026H17Rik | 3027   | chr10 |
| ENSMUSG00000086013.1  | lincRNA        | +   | Gm15706       | 899    | chr6  |
| ENSMUSG00000087590.2  | lincRNA        | +   | Epb4.1I4aos   | 430    | chr18 |
| ENSMUSG00000086290.6  | lincRNA        | +   | Snhg12        | 1363   | chr4  |
| ENSMUSG00000097059.1  | lincRNA        | +   | Fam120aos     | 1780   | chr13 |
| ENSMUSG00000031231.4  | protein_coding | +   | Cox7b         | 1001   | chrX  |
| ENSMUSG00000029632.5  | protein_coding | -   | Ndufa4        | 492    | chr6  |
| ENSMUSG00000026385.14 | protein_coding | -   | Dbi           | 871    | chr1  |
| ENSMUSG00000050856.14 | protein_coding | -   | Atp5k         | 371    | chr5  |
| ENSMUSG00000061808.3  | protein_coding | +   | Ttr           | 1219   | chr18 |
| ENSMUSG00000087687.2  | protein_coding | +   | Pet100        | 1189   | chr8  |
| ENSMUSG00000039016.4  | protein_coding | +   | Timm8b        | 527    | chr9  |
| ENSMUSG00000036751.6  | protein_coding | -   | Cox6b1        | 505    | chr7  |
| ENSMUSG00000031760.8  | protein_coding | +   | Mt3           | 538    | chr8  |
| ENSMUSG00000079523.6  | protein_coding | -   | Tmsb10        | 1018   | chr6  |
| ENSMUSG00000044894.12 | protein_coding | -   | Uqcrq         | 1827   | chr11 |
| ENSMUSG00000054428.10 | protein_coding | -   | Atpif1        | 633    | chr4  |
| ENSMUSG00000054312.6  | protein_coding | -   | Mrps21        | 492    | chr3  |
| ENSMUSG00000024038.14 | protein_coding | +   | Ndufv3        | 2021   | chr17 |
| ENSMUSG00000033307.6  | protein_coding | -   | Mif           | 554    | chr10 |
| ENSMUSG00000032330.6  | protein_coding | -   | Cox7a2        | 754    | chr9  |
| ENSMUSG00000031765.7  | protein_coding | +   | Mt1           | 540    | chr8  |
| ENSMUSG00000035674.11 | protein_coding | +   | Ndufa3        | 397    | chr7  |
| ENSMUSG00000071866.9  | protein_coding | +   | Ppia          | 1170   | chr11 |
| ENSMUSG00000091537.2  | protein_coding | -   | Tma7          | 1278   | chr9  |
| ENSMUSG00000031762.6  | protein_coding | +   | Mt2           | 556    | chr8  |
| ENSMUSG00000040824.2  | protein_coding | +   | Snrpd2        | 613    | chr7  |
| ENSMUSG00000090841.1  | protein_coding | -   | Myl6          | 665    | chr10 |
| ENSMUSG00000037361.7  | protein_coding | +   | Sf3b6         | 1115   | chr12 |
| ENSMUSG00000071528.3  | protein_coding | -   | Usmg5         | 341    | chr19 |
| ENSMUSG00000020163.10 | protein_coding | -   | Uqcr11        | 445    | chr10 |
| ENSMUSG00000061518.8  | protein_coding | +   | Cox5b         | 865    | chr1  |
| ENSMUSG00000028998.6  | protein_coding | -   | Tomm7         | 1125   | chr5  |

|                       |                |   |               |      |       |
|-----------------------|----------------|---|---------------|------|-------|
| ENSMUSG00000041881.10 | protein_coding | + | Ndufa7        | 508  | chr17 |
| ENSMUSG00000035885.4  | protein_coding | - | Cox8a         | 545  | chr19 |
| ENSMUSG00000004366.3  | protein_coding | - | Sst           | 599  | chr16 |
| ENSMUSG00000023020.2  | protein_coding | + | Cox14         | 723  | chr15 |
| ENSMUSG00000084786.7  | protein_coding | + | Ubl5          | 2811 | chr9  |
| ENSMUSG00000033543.15 | protein_coding | + | Gtf2a2        | 1184 | chr9  |
| ENSMUSG00000016427.7  | protein_coding | - | Ndufa1        | 419  | chrX  |
| ENSMUSG00000038690.13 | protein_coding | - | Atp5j2        | 1021 | chr5  |
| ENSMUSG00000049775.14 | protein_coding | - | Tmsb4x        | 1371 | chrX  |
| ENSMUSG00000029642.9  | protein_coding | + | Polr1d        | 2221 | chr5  |
| ENSMUSG00000021290.5  | protein_coding | - | 2010107E04Rik | 365  | chr12 |
| ENSMUSG00000022450.5  | protein_coding | - | Ndufa6        | 560  | chr15 |
| ENSMUSG00000095217.1  | protein_coding | + | Hist1h2bn     | 381  | chr13 |
| ENSMUSG00000020180.9  | protein_coding | + | Snrpd3        | 3028 | chr10 |
| ENSMUSG00000024208.13 | protein_coding | - | Uqcc2         | 610  | chr17 |
| ENSMUSG00000046432.10 | protein_coding | + | Ngfrap1       | 973  | chrX  |
| ENSMUSG00000018102.4  | protein_coding | + | Hist1h2bc     | 736  | chr13 |
| ENSMUSG00000029066.10 | protein_coding | + | Mrpl20        | 926  | chr4  |
| ENSMUSG00000015013.8  | protein_coding | + | Trappc2l      | 607  | chr8  |
| ENSMUSG00000030647.8  | protein_coding | + | Ndufc2        | 683  | chr7  |
| ENSMUSG00000057278.6  | protein_coding | + | Snrpg         | 350  | chr6  |
| ENSMUSG00000035048.11 | protein_coding | + | Anapc13       | 1192 | chr9  |
| ENSMUSG00000030744.10 | protein_coding | - | Rps3          | 1908 | chr7  |
| ENSMUSG00000002379.6  | protein_coding | + | Ndufa11       | 2661 | chr17 |
| ENSMUSG00000009013.5  | protein_coding | - | Dynll1        | 2211 | chr5  |
| ENSMUSG00000005054.6  | protein_coding | + | Cstb          | 599  | chr10 |
| ENSMUSG00000071014.8  | protein_coding | - | Ndufb6        | 659  | chr4  |
| ENSMUSG00000055839.5  | protein_coding | - | Tceb2         | 508  | chr17 |
| ENSMUSG00000059734.6  | protein_coding | - | Ndufs8        | 963  | chr19 |
| ENSMUSG00000025889.11 | protein_coding | - | Snca          | 1463 | chr6  |
| ENSMUSG00000034868.8  | protein_coding | - | Myl12b        | 1253 | chr17 |
| ENSMUSG00000006941.4  | protein_coding | + | Eif1b         | 917  | chr9  |
| ENSMUSG00000063787.3  | protein_coding | + | Chchd1        | 587  | chr14 |
| ENSMUSG00000027133.3  | protein_coding | + | Nop10         | 1109 | chr2  |
| ENSMUSG00000041571.9  | protein_coding | - | Sepw1         | 736  | chr7  |
| ENSMUSG00000073702.9  | protein_coding | + | Rpl31         | 1498 | chr1  |
| ENSMUSG00000059534.8  | protein_coding | - | Uqcr10        | 434  | chr11 |
| ENSMUSG00000029649.8  | protein_coding | + | Pomp          | 5035 | chr5  |
| ENSMUSG00000027533.10 | protein_coding | + | Fabp5         | 987  | chr3  |
| ENSMUSG00000036438.10 | protein_coding | - | Calm2         | 1205 | chr17 |
| ENSMUSG00000018770.7  | protein_coding | - | Atp5g3        | 724  | chr2  |
| ENSMUSG00000054091.9  | protein_coding | + | 1810037117Rik | 1160 | chr3  |
| ENSMUSG00000020022.14 | protein_coding | + | Ndufa12       | 1110 | chr10 |
| ENSMUSG00000074884.10 | protein_coding | + | Serf2         | 3189 | chr2  |
| ENSMUSG00000028691.10 | protein_coding | + | Prdx1         | 2544 | chr4  |
| ENSMUSG00000042541.9  | protein_coding | - | Shfm1         | 1472 | chr6  |
| ENSMUSG00000042750.7  | protein_coding | - | Bex2          | 903  | chrX  |

|                       |                |   |           |      |       |
|-----------------------|----------------|---|-----------|------|-------|
| ENSMUSG00000073616.8  | protein_coding | - | Myeov2    | 759  | chr1  |
| ENSMUSG00000020267.6  | protein_coding | + | Hint1     | 872  | chr11 |
| ENSMUSG00000026568.6  | protein_coding | + | Mpc2      | 1025 | chr1  |
| ENSMUSG00000037152.9  | protein_coding | - | Ndufc1    | 1249 | chr3  |
| ENSMUSG00000009549.12 | protein_coding | - | Srp14     | 1154 | chr2  |
| ENSMUSG00000025204.8  | protein_coding | - | Ndufb8    | 2329 | chr19 |
| ENSMUSG00000029819.6  | protein_coding | + | Npy       | 566  | chr6  |
| ENSMUSG00000096807.1  | protein_coding | + | Hist1h2bm | 381  | chr13 |
| ENSMUSG00000090223.1  | protein_coding | + | Pcp4      | 641  | chr16 |
| ENSMUSG00000029223.10 | protein_coding | + | Uchl1     | 1177 | chr5  |
| ENSMUSG00000050071.8  | protein_coding | - | Bex1      | 866  | chrX  |
| ENSMUSG00000022820.3  | protein_coding | - | Ndufb4    | 971  | chr16 |
| ENSMUSG00000024067.11 | protein_coding | - | Dpy30     | 974  | chr17 |
| ENSMUSG00000022956.8  | protein_coding | - | Atp5o     | 838  | chr16 |
| ENSMUSG00000009863.12 | protein_coding | + | Sdhb      | 1142 | chr4  |
| ENSMUSG00000028367.5  | protein_coding | - | Txn1      | 1051 | chr4  |
| ENSMUSG00000062997.6  | protein_coding | - | Rpl35     | 946  | chr2  |
| ENSMUSG00000061787.12 | protein_coding | - | Rps17     | 494  | chr7  |
| ENSMUSG00000036781.11 | protein_coding | + | Rps27l    | 580  | chr9  |
| ENSMUSG00000036850.4  | protein_coding | - | Mrpl41    | 776  | chr2  |
| ENSMUSG00000042675.13 | protein_coding | + | Ypel3     | 1644 | chr7  |
| ENSMUSG00000017778.12 | protein_coding | - | Cox7c     | 1131 | chr13 |
| ENSMUSG00000036309.12 | protein_coding | + | Skp1a     | 1864 | chr11 |
| ENSMUSG00000042043.5  | protein_coding | + | Tbca      | 503  | chr13 |
| ENSMUSG00000029465.12 | protein_coding | + | Arpc3     | 1170 | chr5  |
| ENSMUSG00000014313.12 | protein_coding | - | Cox6c     | 864  | chr15 |
| ENSMUSG00000051234.6  | protein_coding | - | Rnf7      | 1232 | chr9  |
| ENSMUSG00000022890.11 | protein_coding | - | Atp5j     | 1115 | chr16 |
| ENSMUSG00000027076.8  | protein_coding | + | Timm10    | 815  | chr2  |
| ENSMUSG00000056895.4  | protein_coding | + | Hist3h2ba | 614  | chr11 |
| ENSMUSG00000049536.5  | protein_coding | + | Tceal1    | 2803 | chrX  |
| ENSMUSG00000028643.8  | protein_coding | + | Ccdc23    | 1065 | chr4  |
| ENSMUSG00000032526.10 | protein_coding | + | Deb1      | 517  | chr9  |
| ENSMUSG00000031818.10 | protein_coding | + | Cox4i1    | 765  | chr8  |
| ENSMUSG00000023089.10 | protein_coding | - | Ndufa5    | 875  | chr6  |
| ENSMUSG00000060743.10 | protein_coding | - | H3f3a     | 3001 | chr1  |
| ENSMUSG00000039105.6  | protein_coding | + | Atp6v1g1  | 1135 | chr4  |
| ENSMUSG00000063882.10 | protein_coding | - | Uqcrh     | 547  | chr4  |
| ENSMUSG00000015090.11 | protein_coding | - | Ptgds     | 938  | chr2  |
| ENSMUSG00000062753.11 | protein_coding | - | AI413582  | 836  | chr17 |
| ENSMUSG00000041697.8  | protein_coding | - | Cox6a1    | 571  | chr5  |
| ENSMUSG00000019738.13 | protein_coding | + | Polr2i    | 954  | chr7  |
| ENSMUSG00000069744.7  | protein_coding | + | Psm3      | 766  | chr11 |
| ENSMUSG00000032532.6  | protein_coding | - | Cck       | 685  | chr9  |
| ENSMUSG00000067847.11 | protein_coding | + | Romo1     | 747  | chr2  |
| ENSMUSG00000033429.8  | protein_coding | + | Mcee      | 824  | chr7  |
| ENSMUSG00000058385.7  | protein_coding | + | Hist1h2bg | 477  | chr13 |

|                       |                |   |               |      |       |
|-----------------------|----------------|---|---------------|------|-------|
| ENSMUSG00000006717.6  | protein_coding | - | Acot13        | 721  | chr13 |
| ENSMUSG00000014769.9  | protein_coding | - | Psmb1         | 1036 | chr17 |
| ENSMUSG00000049760.5  | protein_coding | - | 2410015M20Rik | 755  | chr17 |
| ENSMUSG00000057863.5  | protein_coding | + | Rpl36         | 404  | chr17 |
| ENSMUSG00000039771.11 | protein_coding | + | Polr2j        | 1106 | chr5  |
| ENSMUSG00000027581.12 | protein_coding | - | Stmn3         | 1136 | chr2  |
| ENSMUSG00000041959.12 | protein_coding | + | S100a10       | 802  | chr3  |
| ENSMUSG00000026032.8  | protein_coding | + | Ndufb3        | 763  | chr1  |
| ENSMUSG00000023861.15 | protein_coding | + | Mpc1          | 1470 | chr17 |
| ENSMUSG00000045948.8  | protein_coding | - | Mrps12        | 933  | chr7  |
| ENSMUSG00000002768.7  | protein_coding | + | Mea1          | 840  | chr17 |
| ENSMUSG00000008822.13 | protein_coding | - | Acyp1         | 1380 | chr12 |
| ENSMUSG00000070394.8  | protein_coding | + | Tmem256       | 492  | chr11 |
| ENSMUSG00000024646.11 | protein_coding | + | Cyb5a         | 1485 | chr18 |
| ENSMUSG00000071658.4  | protein_coding | - | Gng3          | 1699 | chr19 |
| ENSMUSG00000038722.15 | protein_coding | + | Bud31         | 988  | chr5  |
| ENSMUSG00000022354.3  | protein_coding | + | Ndufb9        | 651  | chr15 |
| ENSMUSG00000004667.16 | protein_coding | - | Polr2e        | 1148 | chr10 |
| ENSMUSG00000003038.13 | protein_coding | - | Hmgn2         | 1993 | chr4  |
| ENSMUSG000000033916.4 | protein_coding | - | Chmp2a        | 927  | chr7  |
| ENSMUSG00000049751.6  | protein_coding | - | Rpl36al       | 1353 | chr12 |
| ENSMUSG00000057841.3  | protein_coding | - | Rpl32         | 517  | chr6  |
| ENSMUSG000000034880.6 | protein_coding | + | Mrpl34        | 645  | chr8  |
| ENSMUSG00000094338.1  | protein_coding | - | Hist1h2bl     | 381  | chr13 |
| ENSMUSG000000030037.8 | protein_coding | + | Mrpl53        | 640  | chr6  |
| ENSMUSG00000021040.13 | protein_coding | + | Slirp         | 3104 | chr12 |
| ENSMUSG00000021520.4  | protein_coding | - | Uqcrb         | 535  | chr13 |
| ENSMUSG00000031516.9  | protein_coding | - | Dctn6         | 1640 | chr8  |
| ENSMUSG00000018293.4  | protein_coding | - | Pfn1          | 1026 | chr11 |
| ENSMUSG00000040048.12 | protein_coding | - | Ndufb10       | 732  | chr17 |
| ENSMUSG00000049299.12 | protein_coding | + | Trappc1       | 842  | chr11 |
| ENSMUSG00000014846.10 | protein_coding | - | Tppp3         | 1848 | chr8  |
| ENSMUSG00000025739.11 | protein_coding | + | Gng13         | 773  | chr17 |
| ENSMUSG00000061615.2  | protein_coding | + | Hist1h2ab     | 473  | chr13 |
| ENSMUSG00000073888.10 | protein_coding | - | Ccl27a        | 1777 | chr4  |
| ENSMUSG00000090247.5  | protein_coding | - | Bloc1s1       | 915  | chr10 |
| ENSMUSG00000020635.7  | protein_coding | - | Fkbp1b        | 979  | chr12 |
| ENSMUSG00000009927.8  | protein_coding | + | Rps25         | 683  | chr9  |
| ENSMUSG00000036372.12 | protein_coding | + | Tmem258       | 698  | chr19 |
| ENSMUSG00000071451.7  | protein_coding | + | Psmg4         | 554  | chr13 |
| ENSMUSG00000042712.8  | protein_coding | + | Wbp5          | 1037 | chrX  |
| ENSMUSG00000031839.6  | protein_coding | + | Hsbp1         | 1163 | chr8  |
| ENSMUSG00000030869.9  | protein_coding | - | Ndufab1       | 4387 | chr7  |
| ENSMUSG00000021643.12 | protein_coding | + | Serf1         | 1315 | chr13 |
| ENSMUSG00000090862.2  | protein_coding | - | Rps13         | 582  | chr7  |
| ENSMUSG00000002580.7  | protein_coding | - | Mien1         | 747  | chr11 |
| ENSMUSG00000075706.8  | protein_coding | + | Gpx4          | 1272 | chr10 |

|                       |                |   |           |      |       |
|-----------------------|----------------|---|-----------|------|-------|
| ENSMUSG00000019054.11 | protein_coding | + | Fis1      | 1102 | chr5  |
| ENSMUSG00000038803.7  | protein_coding | - | Ost4      | 1272 | chr5  |
| ENSMUSG00000020801.8  | protein_coding | - | Med31     | 1161 | chr11 |
| ENSMUSG00000027447.6  | protein_coding | - | Cst3      | 860  | chr2  |
| ENSMUSG00000087260.3  | protein_coding | + | Lamtor5   | 884  | chr3  |
| ENSMUSG00000031197.9  | protein_coding | + | Vbp1      | 1806 | chrX  |
| ENSMUSG00000021917.12 | protein_coding | - | Spcs1     | 1294 | chr14 |
| ENSMUSG00000024099.12 | protein_coding | - | Ndufv2    | 1637 | chr17 |
| ENSMUSG00000017188.3  | protein_coding | - | Coa3      | 886  | chr11 |
| ENSMUSG00000090553.6  | protein_coding | - | Snrpe     | 1372 | chr1  |
| ENSMUSG000000051989.9 | protein_coding | + | Smim11    | 972  | chr16 |
| ENSMUSG00000070493.3  | protein_coding | - | Chchd2    | 915  | chr5  |
| ENSMUSG00000004285.10 | protein_coding | + | Atp6v1f   | 703  | chr6  |
| ENSMUSG00000003873.10 | protein_coding | - | Bax       | 869  | chr7  |
| ENSMUSG00000002477.4  | protein_coding | + | Snrpd1    | 837  | chr18 |
| ENSMUSG000000038412.7 | protein_coding | - | Higd1a    | 1873 | chr9  |
| ENSMUSG00000028447.9  | protein_coding | - | Dctn3     | 973  | chr4  |
| ENSMUSG00000022400.8  | protein_coding | + | Rbx1      | 1655 | chr15 |
| ENSMUSG00000034566.8  | protein_coding | - | Atp5h     | 761  | chr11 |
| ENSMUSG00000031059.9  | protein_coding | - | Ndufb11   | 908  | chrX  |
| ENSMUSG00000001158.11 | protein_coding | - | Snrnp27   | 1365 | chr6  |
| ENSMUSG00000036860.12 | protein_coding | + | Mrpl55    | 1027 | chr11 |
| ENSMUSG00000090000.1  | protein_coding | + | Ier3ip1   | 1395 | chr18 |
| ENSMUSG00000029038.7  | protein_coding | + | Ssu72     | 1616 | chr4  |
| ENSMUSG00000013822.6  | protein_coding | - | Elof1     | 1092 | chr9  |
| ENSMUSG00000034345.12 | protein_coding | + | Gtf2h5    | 2390 | chr17 |
| ENSMUSG00000044627.9  | protein_coding | - | Swi5      | 951  | chr2  |
| ENSMUSG00000093674.5  | protein_coding | - | Rpl41     | 718  | chr10 |
| ENSMUSG00000003955.7  | protein_coding | - | Fam162a   | 635  | chr16 |
| ENSMUSG00000078974.8  | protein_coding | - | Sec61g    | 1977 | chr11 |
| ENSMUSG00000027566.12 | protein_coding | - | Psm7      | 914  | chr2  |
| ENSMUSG00000063316.11 | protein_coding | + | Rpl27     | 880  | chr11 |
| ENSMUSG00000106918.1  | protein_coding | + | Mrpl33    | 478  | chr5  |
| ENSMUSG00000030844.9  | protein_coding | - | Rgs10     | 880  | chr7  |
| ENSMUSG00000050608.9  | protein_coding | - | Minos1    | 2549 | chr4  |
| ENSMUSG00000000355.11 | protein_coding | + | Mcts1     | 783  | chrX  |
| ENSMUSG00000022452.12 | protein_coding | + | Smdt1     | 831  | chr15 |
| ENSMUSG00000001289.10 | protein_coding | + | Pfdn5     | 1386 | chr15 |
| ENSMUSG00000047260.4  | protein_coding | - | Emc6      | 1415 | chr11 |
| ENSMUSG00000027245.9  | protein_coding | + | Hypk      | 4378 | chr2  |
| ENSMUSG00000075031.3  | protein_coding | + | Hist1h2bb | 452  | chr13 |
| ENSMUSG00000028398.8  | protein_coding | - | Tmem261   | 741  | chr4  |
| ENSMUSG00000072772.3  | protein_coding | - | Grcc10    | 863  | chr6  |
| ENSMUSG00000021660.12 | protein_coding | - | Btf3      | 1208 | chr13 |
| ENSMUSG00000023939.7  | protein_coding | + | Mrpl14    | 645  | chr17 |
| ENSMUSG00000028773.8  | protein_coding | + | Fabp3     | 823  | chr4  |
| ENSMUSG00000001707.7  | protein_coding | - | Eef1e1    | 1032 | chr13 |

|                       |                |   |               |      |       |
|-----------------------|----------------|---|---------------|------|-------|
| ENSMUSG00000073676.4  | protein_coding | + | Hspe1         | 774  | chr1  |
| ENSMUSG00000030579.9  | protein_coding | + | Tyrobp        | 564  | chr7  |
| ENSMUSG00000035383.7  | protein_coding | + | Pmch          | 749  | chr10 |
| ENSMUSG00000026688.5  | protein_coding | - | Mgst3         | 1097 | chr1  |
| ENSMUSG00000057322.10 | protein_coding | + | Rpl38         | 542  | chr11 |
| ENSMUSG00000072694.7  | protein_coding | - | 1500011B03Rik | 1746 | chr5  |
| ENSMUSG00000018286.6  | protein_coding | + | Psmb6         | 798  | chr11 |
| ENSMUSG00000030342.8  | protein_coding | - | Cd9           | 1228 | chr6  |
| ENSMUSG00000014504.14 | protein_coding | + | Srp19         | 876  | chr18 |
| ENSMUSG00000034192.4  | protein_coding | + | Lsm3          | 743  | chr6  |
| ENSMUSG00000044629.5  | protein_coding | + | Cnrip1        | 1654 | chr11 |
| ENSMUSG00000022205.13 | protein_coding | - | Sub1          | 3485 | chr15 |
| ENSMUSG00000005687.12 | protein_coding | + | Bcas2         | 1467 | chr3  |
| ENSMUSG00000062963.8  | protein_coding | - | Ufc1          | 1100 | chr1  |
| ENSMUSG00000001105.13 | protein_coding | + | lft20         | 1141 | chr11 |
| ENSMUSG00000024346.5  | protein_coding | - | Pfdn1         | 1077 | chr18 |
| ENSMUSG00000062981.4  | protein_coding | - | Mrpl42        | 666  | chr10 |
| ENSMUSG00000018585.9  | protein_coding | - | Atox1         | 541  | chr11 |
| ENSMUSG00000028832.9  | protein_coding | + | Stmn1         | 1431 | chr4  |
| ENSMUSG00000012483.4  | protein_coding | - | Rpa3          | 670  | chr6  |
| ENSMUSG00000019505.7  | protein_coding | + | Ubb           | 1499 | chr11 |
| ENSMUSG00000006373.10 | protein_coding | + | Pgrmc1        | 1857 | chrX  |
| ENSMUSG00000020485.12 | protein_coding | + | Supt4a        | 706  | chr11 |
| ENSMUSG00000037499.9  | protein_coding | - | Nenf          | 742  | chr1  |
| ENSMUSG00000062328.7  | protein_coding | + | Rpl17         | 775  | chr18 |
| ENSMUSG00000047459.12 | protein_coding | + | Dynlrb1       | 1003 | chr2  |
| ENSMUSG00000020644.8  | protein_coding | - | Id2           | 1270 | chr12 |
| ENSMUSG00000010376.12 | protein_coding | - | Nedd8         | 604  | chr14 |
| ENSMUSG00000037072.13 | protein_coding | + | Selenof       | 1514 | chr3  |
| ENSMUSG00000064168.4  | protein_coding | - | Hist1h2bh     | 388  | chr13 |
| ENSMUSG00000024902.4  | protein_coding | + | Mrpl11        | 2882 | chr19 |
| ENSMUSG00000021243.12 | protein_coding | + | Fcf1          | 812  | chr12 |
| ENSMUSG00000024414.11 | protein_coding | + | Mrpl27        | 756  | chr11 |
| ENSMUSG00000021951.5  | protein_coding | - | N6amt2        | 836  | chr14 |
| ENSMUSG00000067786.14 | protein_coding | + | Nnat          | 1438 | chr2  |
| ENSMUSG0000001383.8   | protein_coding | + | Zmat2         | 2257 | chr18 |
| ENSMUSG00000020526.10 | protein_coding | - | Znhit3        | 998  | chr11 |
| ENSMUSG00000030291.10 | protein_coding | + | Med21         | 1097 | chr6  |
| ENSMUSG00000047721.7  | protein_coding | + | Bola2         | 1540 | chr7  |
| ENSMUSG00000027500.10 | protein_coding | + | Stmn2         | 2073 | chr3  |
| ENSMUSG00000078784.6  | protein_coding | - | 1810022K09Rik | 1396 | chr3  |
| ENSMUSG00000024217.9  | protein_coding | + | Snrpc         | 870  | chr17 |
| ENSMUSG00000069300.3  | protein_coding | + | Hist1h2bj     | 463  | chr13 |
| ENSMUSG00000030218.1  | protein_coding | - | Mgp           | 598  | chr6  |
| ENSMUSG00000031848.12 | protein_coding | + | Lsm4          | 925  | chr8  |
| ENSMUSG00000006589.7  | protein_coding | - | Aprt          | 866  | chr8  |
| ENSMUSG00000023911.10 | protein_coding | - | Flywch2       | 694  | chr17 |

|                       |                |   |               |      |       |
|-----------------------|----------------|---|---------------|------|-------|
| ENSMUSG00000019874.9  | protein_coding | + | Fabp7         | 1250 | chr10 |
| ENSMUSG00000027203.13 | protein_coding | + | Dut           | 2162 | chr2  |
| ENSMUSG00000053317.9  | protein_coding | + | Sec61b        | 564  | chr4  |
| ENSMUSG00000033940.7  | protein_coding | + | Brk1          | 1092 | chr6  |
| ENSMUSG00000063200.3  | protein_coding | + | Nol7          | 1811 | chr13 |
| ENSMUSG00000030417.13 | protein_coding | - | Pdcd5         | 1013 | chr7  |
| ENSMUSG00000022370.11 | protein_coding | - | Mrpl13        | 1223 | chr15 |
| ENSMUSG00000078427.2  | protein_coding | + | Sarnp         | 1062 | chr10 |
| ENSMUSG00000025468.12 | protein_coding | - | Caly          | 1627 | chr7  |
| ENSMUSG00000051579.8  | protein_coding | - | Tceal8        | 2449 | chrX  |
| ENSMUSG00000005716.14 | protein_coding | - | Pvalb         | 1041 | chr15 |
| ENSMUSG00000033578.7  | protein_coding | + | Tmem35        | 1918 | chrX  |
| ENSMUSG00000031104.2  | protein_coding | + | Rab33a        | 1158 | chrX  |
| ENSMUSG00000020949.8  | protein_coding | - | Fkbp3         | 947  | chr12 |
| ENSMUSG00000039195.4  | protein_coding | - | 1110008P14Rik | 2694 | chr2  |
| ENSMUSG00000039680.9  | protein_coding | + | Mrps6         | 846  | chr16 |
| ENSMUSG00000006315.8  | protein_coding | - | Tmem147       | 868  | chr7  |
| ENSMUSG00000032067.5  | protein_coding | - | Pts           | 1035 | chr9  |
| ENSMUSG00000044080.9  | protein_coding | - | S100a1        | 694  | chr3  |
| ENSMUSG00000031879.11 | protein_coding | - | Fam96b        | 917  | chr8  |
| ENSMUSG00000031458.7  | protein_coding | - | Coprs         | 802  | chr8  |
| ENSMUSG00000060032.5  | protein_coding | + | H2afj         | 1827 | chr6  |
| ENSMUSG00000037787.11 | protein_coding | + | Apopt1        | 3883 | chr12 |
| ENSMUSG00000084957.2  | protein_coding | - | Bbip1         | 2488 | chr19 |
| ENSMUSG00000050552.8  | protein_coding | + | Lamtor4       | 877  | chr5  |
| ENSMUSG00000051483.8  | protein_coding | + | Cbr1          | 1237 | chr16 |
| ENSMUSG00000014301.10 | protein_coding | - | Pam16         | 596  | chr16 |
| ENSMUSG00000022427.3  | protein_coding | + | Tomm22        | 1031 | chr15 |
| ENSMUSG00000107002.1  | protein_coding | - | NCBP2-AS2     | 1445 | chr16 |
| ENSMUSG00000020171.7  | protein_coding | - | Yeats4        | 1407 | chr10 |
| ENSMUSG00000025825.10 | protein_coding | + | Iscu          | 1906 | chr5  |
| ENSMUSG00000047238.4  | protein_coding | - | Mageh1        | 1410 | chrX  |
| ENSMUSG00000016252.7  | protein_coding | - | Atp5e         | 421  | chr2  |
| ENSMUSG00000017404.10 | protein_coding | + | Rpl19         | 804  | chr11 |
| ENSMUSG00000035215.8  | protein_coding | - | Lsm7          | 468  | chr10 |
| ENSMUSG00000047246.6  | protein_coding | - | Hist1h2be     | 2438 | chr13 |
| ENSMUSG00000015289.4  | protein_coding | - | Lage3         | 2021 | chrX  |
| ENSMUSG00000075702.9  | protein_coding | + | Selm          | 707  | chr11 |
| ENSMUSG00000062727.4  | protein_coding | + | Hist1h2bk     | 476  | chr13 |
| ENSMUSG00000028062.13 | protein_coding | - | Lamtor2       | 734  | chr3  |
| ENSMUSG00000051319.6  | protein_coding | - | 1500011K16Rik | 800  | chr2  |
| ENSMUSG00000010406.9  | protein_coding | + | Mrpl52        | 480  | chr14 |
| ENSMUSG00000031422.14 | protein_coding | - | Morf4l2       | 2542 | chrX  |
| ENSMUSG00000078453.2  | protein_coding | - | Abrac1        | 807  | chr10 |
| ENSMUSG00000037894.11 | protein_coding | + | H2afz         | 1069 | chr3  |
| ENSMUSG00000039001.10 | protein_coding | + | Rps21         | 394  | chr2  |
| ENSMUSG00000015671.10 | protein_coding | + | Psma2         | 944  | chr13 |

|                        |                |   |               |      |       |
|------------------------|----------------|---|---------------|------|-------|
| ENSMUSG00000063019.5   | protein_coding | + | Manbal        | 1107 | chr2  |
| ENSMUSG00000000295.10  | protein_coding | + | Hddc2         | 859  | chr10 |
| ENSMUSG000000061991.2  | protein_coding | + | Hist1h2af     | 399  | chr13 |
| ENSMUSG000000042737.7  | protein_coding | + | Dpm3          | 827  | chr3  |
| ENSMUSG000000024844.12 | protein_coding | - | Banf1         | 820  | chr19 |
| ENSMUSG000000061762.10 | protein_coding | + | Tac1          | 1230 | chr6  |
| ENSMUSG000000059291.13 | protein_coding | - | Rpl11         | 833  | chr4  |
| ENSMUSG000000060923.5  | protein_coding | - | Acyp2         | 863  | chr11 |
| ENSMUSG000000028609.6  | protein_coding | + | Magoh         | 692  | chr4  |
| ENSMUSG00000002014.10  | protein_coding | + | Ssr4          | 802  | chrX  |
| ENSMUSG000000021764.6  | protein_coding | - | Ndufs4        | 1534 | chr13 |
| ENSMUSG000000026154.4  | protein_coding | - | Sdhaf4        | 683  | chr1  |
| ENSMUSG000000047843.14 | protein_coding | + | Bri3          | 1134 | chr5  |
| ENSMUSG000000046330.9  | protein_coding | + | Rpl37a        | 584  | chr1  |
| ENSMUSG000000020803.3  | protein_coding | + | Txndc17       | 981  | chr11 |
| ENSMUSG000000024914.14 | protein_coding | - | Drap1         | 1128 | chr19 |
| ENSMUSG000000087651.2  | protein_coding | + | 1500009L16Rik | 1193 | chr10 |
| ENSMUSG000000051185.9  | protein_coding | + | Fam174a       | 4814 | chr1  |
| ENSMUSG000000052033.11 | protein_coding | + | Pfdn4         | 1143 | chr2  |
| ENSMUSG000000030335.5  | protein_coding | + | Mrpl51        | 2741 | chr6  |
| ENSMUSG000000033938.5  | protein_coding | + | Ndufb7        | 623  | chr8  |
| ENSMUSG000000020514.6  | protein_coding | + | Mrpl22        | 722  | chr11 |
| ENSMUSG000000078713.6  | protein_coding | - | Tomm5         | 868  | chr4  |
| ENSMUSG000000024516.10 | protein_coding | + | Sec11c        | 807  | chr18 |
| ENSMUSG000000024829.10 | protein_coding | + | Mrpl21        | 1363 | chr19 |
| ENSMUSG000000034892.8  | protein_coding | - | Rps29         | 390  | chr12 |
| ENSMUSG000000020415.14 | protein_coding | - | Pttg1         | 1766 | chr11 |
| ENSMUSG000000098274.5  | protein_coding | + | Rpl24         | 677  | chr16 |
| ENSMUSG000000022635.7  | protein_coding | - | Zcrb1         | 886  | chr15 |
| ENSMUSG000000046727.10 | protein_coding | + | Cystm1        | 1006 | chr18 |
| ENSMUSG000000062248.5  | protein_coding | + | Cks2          | 692  | chr13 |
| ENSMUSG000000021361.6  | protein_coding | + | Tmem14c       | 945  | chr13 |
| ENSMUSG000000028295.12 | protein_coding | - | Smim8         | 1021 | chr4  |
| ENSMUSG000000041453.10 | protein_coding | + | Rpl21         | 2402 | chr5  |
| ENSMUSG000000066456.12 | protein_coding | - | Hmgn3         | 1546 | chr9  |
| ENSMUSG000000033751.5  | protein_coding | + | Gadd45gip1    | 2494 | chr8  |
| ENSMUSG000000065990.10 | protein_coding | + | Aurkaip1      | 1406 | chr4  |
| ENSMUSG000000063694.5  | protein_coding | - | Cycs          | 3123 | chr6  |
| ENSMUSG000000021241.6  | protein_coding | + | Isca2         | 868  | chr12 |
| ENSMUSG000000026087.9  | protein_coding | + | Mrpl30        | 973  | chr1  |
| ENSMUSG000000034932.4  | protein_coding | - | Mrpl54        | 604  | chr10 |
| ENSMUSG000000059325.12 | protein_coding | - | Hopx          | 1516 | chr5  |
| ENSMUSG000000020955.8  | protein_coding | + | Ap4s1         | 1113 | chr12 |
| ENSMUSG000000078566.6  | protein_coding | - | Bnip3         | 1756 | chr7  |
| ENSMUSG000000037710.8  | protein_coding | - | Cisd1         | 1084 | chr10 |
| ENSMUSG000000019797.8  | protein_coding | - | 1700021F05Rik | 899  | chr10 |
| ENSMUSG000000042831.11 | protein_coding | + | Alkbh6        | 982  | chr7  |



|                       |                |   |               |      |       |
|-----------------------|----------------|---|---------------|------|-------|
| ENSMUSG0000000581.6   | protein_coding | + | C1d           | 2981 | chr11 |
| ENSMUSG00000026021.13 | protein_coding | - | Sumo1         | 1215 | chr1  |
| ENSMUSG00000069268.4  | protein_coding | - | Hist1h2bf     | 461  | chr13 |
| ENSMUSG00000076437.8  | protein_coding | - | 2700094K13Rik | 1039 | chr2  |
| ENSMUSG00000062352.11 | protein_coding | - | Itgb1bp1      | 2251 | chr12 |
| ENSMUSG00000044155.9  | protein_coding | + | Lsm8          | 807  | chr6  |
| ENSMUSG00000025868.6  | protein_coding | + | Higd2a        | 648  | chr13 |
| ENSMUSG00000022111.8  | protein_coding | + | Uchl3         | 929  | chr14 |
| ENSMUSG00000016637.6  | protein_coding | - | Ift27         | 1012 | chr15 |
| ENSMUSG00000032381.5  | protein_coding | + | Fam96a        | 1240 | chr9  |
| ENSMUSG00000054717.6  | protein_coding | + | Hmgb2         | 2692 | chr8  |
| ENSMUSG00000020477.8  | protein_coding | - | Mrps24        | 995  | chr11 |
| ENSMUSG00000020219.6  | protein_coding | - | Timm13        | 1225 | chr10 |
| ENSMUSG00000058833.9  | protein_coding | - | 2810428I15Rik | 690  | chr8  |
| ENSMUSG00000078348.4  | protein_coding | + | Sf3b5         | 3841 | chr10 |
| ENSMUSG00000010607.8  | protein_coding | + | Pigyl         | 777  | chr9  |
| ENSMUSG00000059278.7  | protein_coding | + | Naa38         | 671  | chr11 |
| ENSMUSG00000079435.7  | protein_coding | + | Rpl36a        | 483  | chrX  |
| ENSMUSG00000045996.10 | protein_coding | + | Polr2k        | 624  | chr15 |
| ENSMUSG00000070858.9  | protein_coding | + | Gm1673        | 669  | chr5  |
| ENSMUSG00000038717.7  | protein_coding | - | Atp5l         | 511  | chr9  |
| ENSMUSG00000022940.14 | protein_coding | - | Pigp          | 1259 | chr16 |
| ENSMUSG00000037058.12 | protein_coding | + | Paip2         | 1830 | chr18 |
| ENSMUSG00000036570.12 | protein_coding | - | Fxyd1         | 709  | chr7  |
| ENSMUSG00000064030.12 | protein_coding | + | Wibg          | 1285 | chr10 |
| ENSMUSG00000038622.7  | protein_coding | + | Med30         | 871  | chr15 |
| ENSMUSG00000063171.3  | protein_coding | + | Rps4l         | 943  | chr6  |
| ENSMUSG00000047844.3  | protein_coding | + | Bex4          | 837  | chrX  |
| ENSMUSG00000028470.8  | protein_coding | - | Hint2         | 610  | chr4  |
| ENSMUSG00000019689.4  | protein_coding | + | 1110001J03Rik | 479  | chr6  |
| ENSMUSG00000047557.2  | protein_coding | - | Lxn           | 1112 | chr3  |
| ENSMUSG00000061983.6  | protein_coding | - | Rps12         | 476  | chr10 |
| ENSMUSG00000025532.11 | protein_coding | + | Crcp          | 1492 | chr5  |
| ENSMUSG00000074754.4  | protein_coding | + | Gm561         | 471  | chr2  |
| ENSMUSG00000008333.10 | protein_coding | + | Snrpb2        | 2061 | chr2  |
| ENSMUSG00000030663.10 | protein_coding | + | 1110004F10Rik | 1479 | chr7  |
| ENSMUSG00000067924.4  | protein_coding | - | Cxx1b         | 1232 | chrX  |
| ENSMUSG00000025290.14 | protein_coding | + | Rps24         | 840  | chr14 |
| ENSMUSG00000014294.4  | protein_coding | - | Ndufa2        | 572  | chr18 |
| ENSMUSG00000058267.11 | protein_coding | + | Mrps14        | 3233 | chr1  |
| ENSMUSG00000042198.10 | protein_coding | + | Chchd7        | 1568 | chr4  |
| ENSMUSG00000051518.7  | protein_coding | - | Rps19bp1      | 830  | chr15 |
| ENSMUSG00000031683.14 | protein_coding | - | Lsm6          | 3792 | chr8  |
| ENSMUSG00000026051.8  | protein_coding | + | 1500015O10Rik | 902  | chr1  |
| ENSMUSG00000049517.7  | protein_coding | + | Rps23         | 756  | chr13 |
| ENSMUSG00000021131.11 | protein_coding | - | Erh           | 1350 | chr12 |
| ENSMUSG00000001025.6  | protein_coding | + | S100a6        | 809  | chr3  |

|                       |                |   |               |      |       |
|-----------------------|----------------|---|---------------|------|-------|
| ENSMUSG00000062006.10 | protein_coding | - | Rpl34         | 1101 | chr3  |
| ENSMUSG00000031897.8  | protein_coding | - | Psmb10        | 1270 | chr8  |
| ENSMUSG00000022013.3  | protein_coding | - | Dnajc15       | 648  | chr14 |
| ENSMUSG00000020903.11 | protein_coding | + | Stx8          | 6941 | chr11 |
| ENSMUSG00000032766.8  | protein_coding | + | Gng11         | 880  | chr6  |
| ENSMUSG00000016495.10 | protein_coding | - | Plgrkt        | 1118 | chr19 |
| ENSMUSG00000028145.9  | protein_coding | + | Them4         | 1781 | chr3  |
| ENSMUSG00000094500.2  | protein_coding | - | Smim18        | 587  | chr8  |
| ENSMUSG00000027472.12 | protein_coding | - | Pdrg1         | 1273 | chr2  |
| ENSMUSG00000063253.8  | protein_coding | - | Scoc          | 2062 | chr8  |
| ENSMUSG00000014075.13 | protein_coding | + | Tctex1d2      | 838  | chr16 |
| ENSMUSG00000007777.7  | protein_coding | - | 0610009B22Rik | 998  | chr11 |
| ENSMUSG00000057506.4  | protein_coding | - | Bloc1s2       | 878  | chr19 |
| ENSMUSG00000049086.8  | protein_coding | + | Bmyc          | 983  | chr2  |
| ENSMUSG00000007721.5  | protein_coding | - | Ccdc124       | 911  | chr8  |
| ENSMUSG00000028443.6  | protein_coding | + | Nudt2         | 845  | chr4  |
| ENSMUSG00000049960.3  | protein_coding | - | Mrps16        | 566  | chr14 |
| ENSMUSG00000045854.4  | protein_coding | + | Lym2          | 465  | chr4  |
| ENSMUSG00000076432.10 | protein_coding | - | Ywhaq         | 2167 | chr12 |
| ENSMUSG00000074578.10 | protein_coding | + | 1500012F01Rik | 737  | chr2  |
| ENSMUSG00000059355.11 | protein_coding | + | Wdr83os       | 922  | chr8  |
| ENSMUSG00000051671.6  | protein_coding | + | Coa6          | 762  | chr8  |
| ENSMUSG00000042682.8  | protein_coding | + | Selk          | 1090 | chr14 |
| ENSMUSG00000016833.12 | protein_coding | + | Mrps18c       | 940  | chr5  |
| ENSMUSG00000079197.8  | protein_coding | - | Psme2         | 976  | chr14 |
| ENSMUSG00000030615.9  | protein_coding | - | Tmem126a      | 794  | chr7  |
| ENSMUSG00000029715.5  | protein_coding | - | Pop7          | 1081 | chr5  |
| ENSMUSG00000079641.3  | protein_coding | - | Rpl39         | 612  | chrX  |
| ENSMUSG00000027673.10 | protein_coding | + | Ndufb5        | 1291 | chr3  |
| ENSMUSG00000031950.7  | protein_coding | + | Gabarapl2     | 1677 | chr8  |
| ENSMUSG00000023967.7  | protein_coding | + | Mrps18a       | 1037 | chr17 |
| ENSMUSG00000003429.10 | protein_coding | - | Rps11         | 602  | chr7  |
| ENSMUSG00000021124.11 | protein_coding | - | Vti1b         | 1490 | chr12 |
| ENSMUSG00000042462.4  | protein_coding | - | Dctpp1        | 676  | chr7  |
| ENSMUSG00000027165.14 | protein_coding | - | B230118H07Rik | 2856 | chr2  |
| ENSMUSG00000004610.3  | protein_coding | + | Etfb          | 868  | chr7  |
| ENSMUSG00000021606.7  | protein_coding | - | Ndufs6        | 568  | chr13 |
| ENSMUSG00000025508.11 | protein_coding | + | Rplp2         | 1052 | chr7  |
| ENSMUSG00000062691.8  | protein_coding | + | Cebpzoz       | 770  | chr17 |
| ENSMUSG00000033020.6  | protein_coding | + | Polr2f        | 543  | chr15 |
| ENSMUSG00000063320.9  | protein_coding | - | 1190007I07Rik | 1197 | chr10 |
| ENSMUSG00000022359.9  | protein_coding | + | Wdyhv1        | 1322 | chr15 |
| ENSMUSG00000025785.4  | protein_coding | + | Exosc7        | 1053 | chr9  |
| ENSMUSG00000045435.9  | protein_coding | + | Tmem60        | 1147 | chr5  |
| ENSMUSG00000030532.5  | protein_coding | + | Hddc3         | 860  | chr7  |
| ENSMUSG00000063021.3  | protein_coding | - | Hist1h2ak     | 393  | chr13 |
| ENSMUSG00000044408.6  | protein_coding | - | Sptssa        | 1363 | chr12 |

|                       |                |   |               |      |       |
|-----------------------|----------------|---|---------------|------|-------|
| ENSMUSG00000079508.6  | protein_coding | + | Apoo          | 1255 | chrX  |
| ENSMUSG00000029918.9  | protein_coding | - | Mrps33        | 1538 | chr6  |
| ENSMUSG00000049124.3  | protein_coding | - | Gm8186        | 386  | chr17 |
| ENSMUSG00000025933.13 | protein_coding | + | Tmem14a       | 1351 | chr1  |
| ENSMUSG00000019890.3  | protein_coding | - | Nts           | 1176 | chr10 |
| ENSMUSG00000026966.6  | protein_coding | - | Ssna1         | 862  | chr2  |
| ENSMUSG00000023064.4  | protein_coding | - | Sncg          | 852  | chr14 |
| ENSMUSG00000032575.14 | protein_coding | - | Manf          | 2464 | chr9  |
| ENSMUSG00000018287.10 | protein_coding | - | Spag7         | 1159 | chr11 |
| ENSMUSG00000020738.14 | protein_coding | - | Sumo2         | 1166 | chr11 |
| ENSMUSG00000035790.13 | protein_coding | + | Cep19         | 1751 | chr16 |
| ENSMUSG00000043716.11 | protein_coding | - | Rpl7          | 1163 | chr1  |
| ENSMUSG00000020778.10 | protein_coding | + | Ten1          | 902  | chr11 |
| ENSMUSG00000030188.10 | protein_coding | - | Magohb        | 1287 | chr6  |
| ENSMUSG00000041084.8  | protein_coding | - | Ostc          | 1067 | chr3  |
| ENSMUSG00000068523.10 | protein_coding | + | Gng5          | 2765 | chr3  |
| ENSMUSG00000021018.7  | protein_coding | + | Polr2h        | 950  | chr16 |
| ENSMUSG00000078681.8  | protein_coding | + | Tm2d3         | 1480 | chr7  |
| ENSMUSG00000037727.6  | protein_coding | - | Avp           | 577  | chr2  |
| ENSMUSG00000004642.11 | protein_coding | - | Slbp          | 2645 | chr5  |
| ENSMUSG00000035642.14 | protein_coding | - | Aamdc         | 1003 | chr7  |
| ENSMUSG00000020460.13 | protein_coding | - | Rps27a        | 886  | chr11 |
| ENSMUSG00000045237.5  | protein_coding | + | 1110012L19Rik | 1094 | chrX  |
| ENSMUSG00000058546.8  | protein_coding | - | Rpl23a        | 560  | chr11 |
| ENSMUSG00000019761.9  | protein_coding | - | Krt10         | 2094 | chr11 |
| ENSMUSG00000036513.13 | protein_coding | - | Commd2        | 2992 | chr3  |
| ENSMUSG00000025283.13 | protein_coding | - | Sat1          | 1183 | chrX  |
| ENSMUSG00000052419.7  | protein_coding | - | 2610001J05Rik | 3784 | chr6  |
| ENSMUSG00000040269.5  | protein_coding | - | Mrps28        | 783  | chr3  |
| ENSMUSG00000004096.8  | protein_coding | + | Cwc15         | 1111 | chr9  |
| ENSMUSG00000090258.5  | protein_coding | + | Churc1        | 676  | chr12 |
| ENSMUSG00000025362.5  | protein_coding | - | Rps26         | 447  | chr10 |
| ENSMUSG00000069272.5  | protein_coding | - | Hist1h2ae     | 460  | chr13 |
| ENSMUSG00000057455.10 | protein_coding | - | Rit2          | 3078 | chr18 |
| ENSMUSG00000020390.10 | protein_coding | - | Ube2b         | 1878 | chr11 |
| ENSMUSG00000032757.4  | protein_coding | - | Bet1          | 1516 | chr6  |
| ENSMUSG00000031697.9  | protein_coding | + | Orc6          | 1653 | chr8  |
| ENSMUSG00000051355.16 | protein_coding | - | Commd1        | 5391 | chr11 |
| ENSMUSG00000036578.6  | protein_coding | - | Fxyd7         | 684  | chr7  |
| ENSMUSG00000032551.6  | protein_coding | - | 1110059G10Rik | 3361 | chr9  |
| ENSMUSG00000021079.13 | protein_coding | - | Timm9         | 1018 | chr12 |
| ENSMUSG00000028563.14 | protein_coding | - | Tm2d1         | 1027 | chr4  |
| ENSMUSG00000014554.11 | protein_coding | - | Dguok         | 1107 | chr6  |
| ENSMUSG00000020056.14 | protein_coding | + | Ccdc53        | 1383 | chr10 |
| ENSMUSG00000030220.11 | protein_coding | - | Arhgdib       | 1478 | chr6  |
| ENSMUSG0000002930.5   | protein_coding | + | Ppp1r17       | 1738 | chr6  |
| ENSMUSG00000001666.8  | protein_coding | - | Ddt           | 773  | chr10 |

|                       |                |   |               |      |       |
|-----------------------|----------------|---|---------------|------|-------|
| ENSMUSG00000067288.10 | protein_coding | - | Rps28         | 588  | chr17 |
| ENSMUSG00000052456.8  | protein_coding | - | Asna1         | 1250 | chr8  |
| ENSMUSG00000051851.5  | protein_coding | + | Cxx1c         | 401  | chrX  |
| ENSMUSG00000021591.7  | protein_coding | + | Glrx          | 1345 | chr13 |
| ENSMUSG00000010911.10 | protein_coding | + | Apip          | 919  | chr2  |
| ENSMUSG00000038489.8  | protein_coding | - | Polr2l        | 1650 | chr7  |
| ENSMUSG00000024446.11 | protein_coding | - | Rpp21         | 729  | chr17 |
| ENSMUSG00000041841.7  | protein_coding | + | Rpl37         | 867  | chr15 |
| ENSMUSG00000030611.8  | protein_coding | + | Mrps11        | 1056 | chr7  |
| ENSMUSG00000038274.9  | protein_coding | + | Fau           | 815  | chr19 |
| ENSMUSG00000028648.11 | protein_coding | - | Ndufs5        | 860  | chr4  |
| ENSMUSG00000024800.7  | protein_coding | + | Rpp30         | 1155 | chr19 |
| ENSMUSG00000042705.8  | protein_coding | + | Commd10       | 1561 | chr18 |
| ENSMUSG00000027944.11 | protein_coding | - | Hax1          | 1204 | chr3  |
| ENSMUSG00000051736.6  | protein_coding | - | Fam229b       | 1044 | chr10 |
| ENSMUSG00000075266.4  | protein_coding | - | Cenpw         | 1510 | chr10 |
| ENSMUSG00000075229.8  | protein_coding | + | Ccdc58        | 1225 | chr16 |
| ENSMUSG00000035443.9  | protein_coding | + | Thyn1         | 959  | chr9  |
| ENSMUSG00000078695.6  | protein_coding | + | Cisd3         | 833  | chr11 |
| ENSMUSG00000021647.6  | protein_coding | - | Cartpt        | 874  | chr13 |
| ENSMUSG00000079283.2  | protein_coding | - | 2310009B15Rik | 565  | chr1  |
| ENSMUSG00000038646.11 | protein_coding | + | Fam103a1      | 1534 | chr7  |
| ENSMUSG00000036764.9  | protein_coding | + | Dnajc12       | 1289 | chr10 |
| ENSMUSG00000042670.5  | protein_coding | + | Immp1l        | 955  | chr2  |
| ENSMUSG00000091625.6  | protein_coding | - | Lsm5          | 494  | chr6  |
| ENSMUSG00000068855.3  | protein_coding | - | Hist2h2ac     | 520  | chr3  |
| ENSMUSG00000048040.8  | protein_coding | + | Arxes2        | 1532 | chrX  |
| ENSMUSG00000028495.12 | protein_coding | - | Rps6          | 878  | chr4  |
| ENSMUSG00000029559.13 | protein_coding | + | 2210016L21Rik | 2607 | chr5  |
| ENSMUSG00000060152.12 | protein_coding | + | Pop5          | 1025 | chr5  |
| ENSMUSG00000075486.7  | protein_coding | - | Commd6        | 1090 | chr14 |
| ENSMUSG00000032398.6  | protein_coding | + | Snpc5         | 757  | chr9  |
| ENSMUSG00000069270.5  | protein_coding | - | Hist1h2ac     | 476  | chr13 |
| ENSMUSG00000032060.9  | protein_coding | + | Cryab         | 1185 | chr9  |
| ENSMUSG00000018923.11 | protein_coding | + | Med11         | 932  | chr11 |
| ENSMUSG0000003824.10  | protein_coding | + | Syce2         | 1704 | chr8  |
| ENSMUSG00000037772.10 | protein_coding | + | Mrpl23        | 692  | chr7  |
| ENSMUSG00000014980.12 | protein_coding | - | Tsen15        | 1133 | chr1  |
| ENSMUSG00000060802.8  | protein_coding | + | B2m           | 860  | chr2  |
| ENSMUSG00000042747.10 | protein_coding | + | Krtcap2       | 1250 | chr3  |
| ENSMUSG00000025794.8  | protein_coding | + | Rpl14         | 935  | chr9  |
| ENSMUSG00000040370.11 | protein_coding | + | Lym5          | 2682 | chr6  |
| ENSMUSG00000040204.6  | protein_coding | + | 2810417H13Rik | 2188 | chr9  |
| ENSMUSG00000071654.5  | protein_coding | - | Uqc3          | 829  | chr19 |
| ENSMUSG00000064326.10 | protein_coding | + | Siva1         | 782  | chr12 |
| ENSMUSG0000004885.5   | protein_coding | + | Crabp2        | 931  | chr3  |
| ENSMUSG00000019362.7  | protein_coding | - | D8ErtD738e    | 659  | chr8  |

|                       |                |   |               |      |       |
|-----------------------|----------------|---|---------------|------|-------|
| ENSMUSG00000091931.5  | protein_coding | - | AK010878      | 1417 | chr12 |
| ENSMUSG00000060703.10 | protein_coding | - | Cd302         | 1354 | chr2  |
| ENSMUSG00000089847.5  | protein_coding | + | Timm10b       | 3478 | chr7  |
| ENSMUSG00000001039.10 | protein_coding | + | B9d1          | 817  | chr11 |
| ENSMUSG00000086158.2  | protein_coding | - | Ccpg1os       | 711  | chr9  |
| ENSMUSG00000040767.8  | protein_coding | + | Snrnp25       | 843  | chr11 |
| ENSMUSG00000092486.1  | protein_coding | - | 2610524H06Rik | 947  | chr5  |
| ENSMUSG00000008668.12 | protein_coding | - | Rps18         | 600  | chr17 |
| ENSMUSG00000046516.10 | protein_coding | + | Cox17         | 3740 | chr16 |
| ENSMUSG00000039221.8  | protein_coding | + | Rpl22l1       | 561  | chr3  |
| ENSMUSG00000024608.8  | protein_coding | + | Rps14         | 940  | chr18 |
| ENSMUSG00000022018.7  | protein_coding | - | Rgcc          | 918  | chr14 |
| ENSMUSG00000036315.11 | protein_coding | - | Znrd1         | 793  | chr17 |
| ENSMUSG00000044709.5  | protein_coding | - | Gemin7        | 1281 | chr7  |
| ENSMUSG00000032251.10 | protein_coding | + | Irak1bp1      | 2158 | chr9  |
| ENSMUSG00000032403.8  | protein_coding | - | 2300009A05Rik | 595  | chr9  |
| ENSMUSG00000061461.9  | protein_coding | + | Smim20        | 953  | chr5  |
| ENSMUSG00000090110.6  | protein_coding | - | Mtcp1         | 1310 | chrX  |
| ENSMUSG00000002395.12 | protein_coding | + | Use1          | 1085 | chr8  |
| ENSMUSG00000036905.8  | protein_coding | - | C1qb          | 1088 | chr4  |
| ENSMUSG00000061474.9  | protein_coding | - | Mrps36        | 701  | chr13 |
| ENSMUSG00000015943.9  | protein_coding | - | Bola1         | 1082 | chr3  |
| ENSMUSG00000068391.6  | protein_coding | + | Chrac1        | 1090 | chr15 |
| ENSMUSG00000017716.13 | protein_coding | + | Birc5         | 3402 | chr11 |
| ENSMUSG00000060938.12 | protein_coding | + | Rpl26         | 714  | chr11 |
| ENSMUSG00000058351.9  | protein_coding | - | Smim4         | 592  | chr14 |
| ENSMUSG00000061702.8  | protein_coding | - | Tmem91        | 877  | chr7  |
| ENSMUSG00000021508.10 | protein_coding | - | Cxcl14        | 1823 | chr13 |
| ENSMUSG00000025144.15 | protein_coding | - | Stra13        | 966  | chr11 |
| ENSMUSG00000078572.3  | protein_coding | + | 1810043H04Rik | 785  | chr11 |
| ENSMUSG00000036992.8  | protein_coding | + | Nxt1          | 1116 | chr2  |
| ENSMUSG00000020018.6  | protein_coding | - | Snrpf         | 861  | chr10 |
| ENSMUSG00000059518.12 | protein_coding | - | Znhit1        | 1860 | chr5  |
| ENSMUSG00000038812.14 | protein_coding | + | Trmt112       | 1133 | chr19 |
| ENSMUSG00000028044.6  | protein_coding | - | Cks1b         | 1080 | chr3  |
| ENSMUSG00000091898.6  | protein_coding | + | Tnnc1         | 721  | chr14 |
| ENSMUSG00000021607.8  | protein_coding | + | Mrpl36        | 899  | chr13 |
| ENSMUSG00000020098.6  | protein_coding | + | Pcbd1         | 809  | chr10 |
| ENSMUSG00000038900.15 | protein_coding | + | Rpl12         | 1242 | chr2  |
| ENSMUSG00000020116.7  | protein_coding | - | Pno1          | 1544 | chr11 |
| ENSMUSG00000045257.9  | protein_coding | + | Morn2         | 644  | chr17 |
| ENSMUSG00000047656.8  | protein_coding | + | Trpt1         | 1142 | chr19 |
| ENSMUSG00000007867.8  | protein_coding | + | Ift43         | 775  | chr12 |
| ENSMUSG00000025102.12 | protein_coding | - | 3110040N11Rik | 887  | chr7  |
| ENSMUSG00000060591.8  | protein_coding | - | Ifitm2        | 627  | chr7  |
| ENSMUSG00000068220.5  | protein_coding | + | Lgals1        | 800  | chr15 |
| ENSMUSG00000079427.8  | protein_coding | - | Mthfsl        | 801  | chr9  |

|                       |                |   |               |      |       |
|-----------------------|----------------|---|---------------|------|-------|
| ENSMUSG00000048758.11 | protein_coding | + | Rpl29         | 796  | chr9  |
| ENSMUSG00000025408.13 | protein_coding | + | Ddit3         | 890  | chr10 |
| ENSMUSG00000042312.9  | protein_coding | + | S100a13       | 715  | chr3  |
| ENSMUSG00000068184.6  | protein_coding | - | Ndufaf2       | 679  | chr13 |
| ENSMUSG00000008540.9  | protein_coding | + | Mgst1         | 1834 | chr6  |
| ENSMUSG00000001134.7  | protein_coding | - | Uxt           | 875  | chrX  |
| ENSMUSG00000024854.3  | protein_coding | + | Pold4         | 910  | chr19 |
| ENSMUSG00000034353.12 | protein_coding | + | Ramp1         | 3022 | chr1  |
| ENSMUSG00000024907.6  | protein_coding | - | Gal           | 712  | chr19 |
| ENSMUSG00000021496.10 | protein_coding | + | Pcbd2         | 546  | chr13 |
| ENSMUSG00000027907.4  | protein_coding | + | S100a11       | 511  | chr3  |
| ENSMUSG00000079317.8  | protein_coding | + | Trappc2       | 1684 | chrX  |
| ENSMUSG00000069267.2  | protein_coding | + | Hist1h3b      | 620  | chr13 |
| ENSMUSG00000028461.10 | protein_coding | + | Ccdc107       | 892  | chr4  |
| ENSMUSG00000059363.8  | protein_coding | - | Fxn           | 1114 | chr19 |
| ENSMUSG00000039672.10 | protein_coding | + | Kcne2         | 1767 | chr16 |
| ENSMUSG00000024480.7  | protein_coding | + | Ap3s1         | 1479 | chr18 |
| ENSMUSG00000006715.9  | protein_coding | - | Gmnn          | 1189 | chr13 |
| ENSMUSG00000078941.7  | protein_coding | + | Ak6           | 2324 | chr13 |
| ENSMUSG00000056313.5  | protein_coding | - | 1810011O10Rik | 1805 | chr8  |
| ENSMUSG00000022748.7  | protein_coding | - | Cmss1         | 930  | chr16 |
| ENSMUSG00000030922.9  | protein_coding | + | Lymr1         | 1513 | chr7  |
| ENSMUSG00000001305.5  | protein_coding | - | Rrp15         | 1321 | chr1  |
| ENSMUSG00000048747.12 | protein_coding | - | E130114P18Rik | 1246 | chr4  |
| ENSMUSG00000062210.11 | protein_coding | + | Tnfaip8       | 4344 | chr18 |
| ENSMUSG00000009076.8  | protein_coding | + | Zmat5         | 792  | chr11 |
| ENSMUSG00000035984.12 | protein_coding | - | Nme5          | 843  | chr18 |
| ENSMUSG00000052565.6  | protein_coding | + | Hist1h1d      | 744  | chr13 |
| ENSMUSG00000048416.13 | protein_coding | + | Mlf1          | 1164 | chr3  |
| ENSMUSG00000029551.11 | protein_coding | - | Psmg3         | 883  | chr5  |
| ENSMUSG00000079480.3  | protein_coding | + | Pin4          | 489  | chrX  |
| ENSMUSG00000002804.3  | protein_coding | - | Nudt14        | 793  | chr12 |
| ENSMUSG00000045731.5  | protein_coding | - | Pnoc          | 2157 | chr14 |
| ENSMUSG00000056209.7  | protein_coding | - | Npm3          | 888  | chr19 |
| ENSMUSG00000023330.10 | protein_coding | + | Dtwd1         | 1350 | chr2  |
| ENSMUSG00000020895.12 | protein_coding | + | Tmem107       | 1268 | chr11 |
| ENSMUSG00000075394.4  | protein_coding | + | Hoxc4         | 2568 | chr15 |
| ENSMUSG00000045107.4  | protein_coding | - | Saysd1        | 2294 | chr14 |
| ENSMUSG00000045031.16 | protein_coding | - | Cetn4         | 3854 | chr3  |
| ENSMUSG00000029177.7  | protein_coding | + | Cenpa         | 1641 | chr5  |
| ENSMUSG00000001827.9  | protein_coding | - | Folr1         | 1575 | chr7  |
| ENSMUSG00000042770.7  | protein_coding | - | Hebp1         | 1061 | chr6  |
| ENSMUSG00000032478.12 | protein_coding | + | Nme6          | 1240 | chr9  |
| ENSMUSG00000078958.7  | protein_coding | - | Atp6ap1l      | 1186 | chr13 |
| ENSMUSG00000061086.10 | protein_coding | + | Myl4          | 1202 | chr11 |
